# Supplementary material
Source: publisher site journal article supplement (https://www.dovepress.com/get_supplementary_file.php?f=418100.docx)
Supplement: Supplementary file 1 [file get_supplementary_file.php]

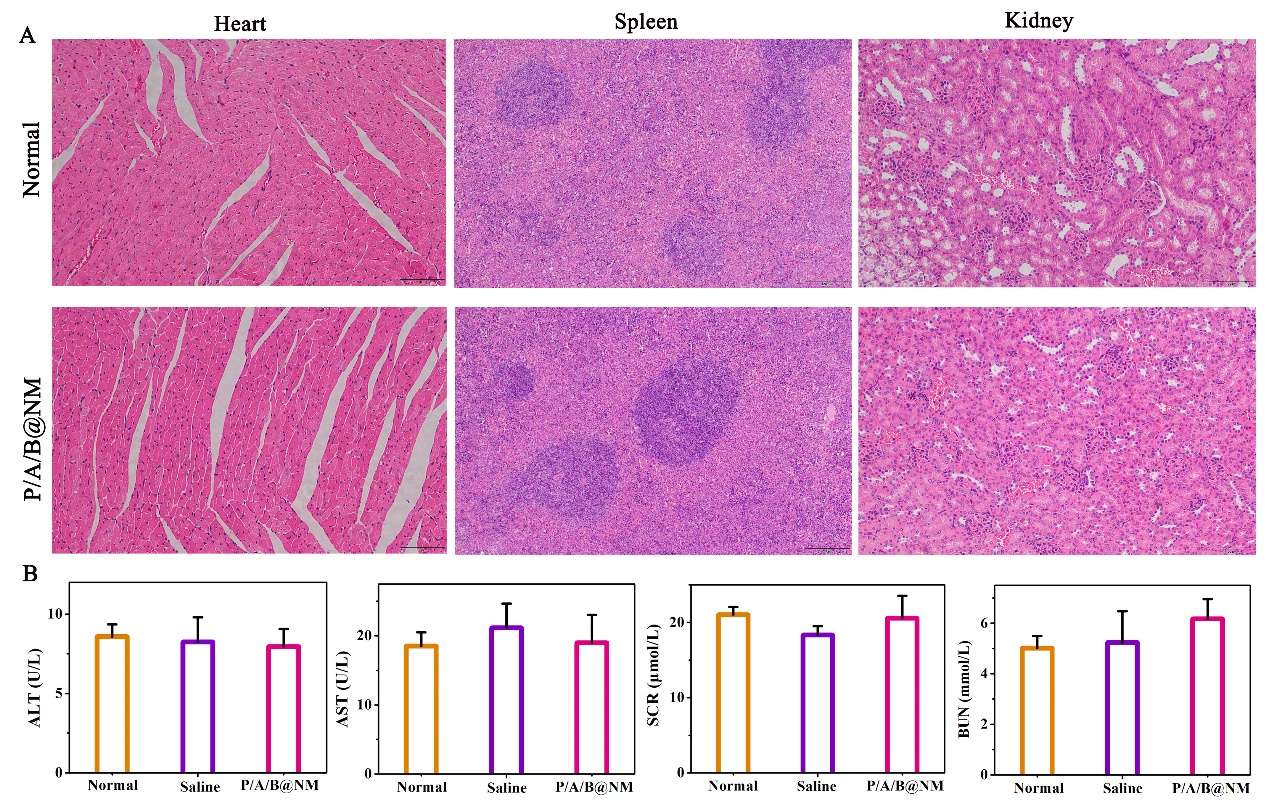


**Figure S1** Therapeutic safety assessment of co-delivery nanomicelles based combination therapy. (A) Histological analysis of heart, spleen and kidney after P/A/B@NM treatment. (B) Serum biochemical assay result showing indicators of liver and kidney function (*n*=3). Error bars represent means ± SEM.


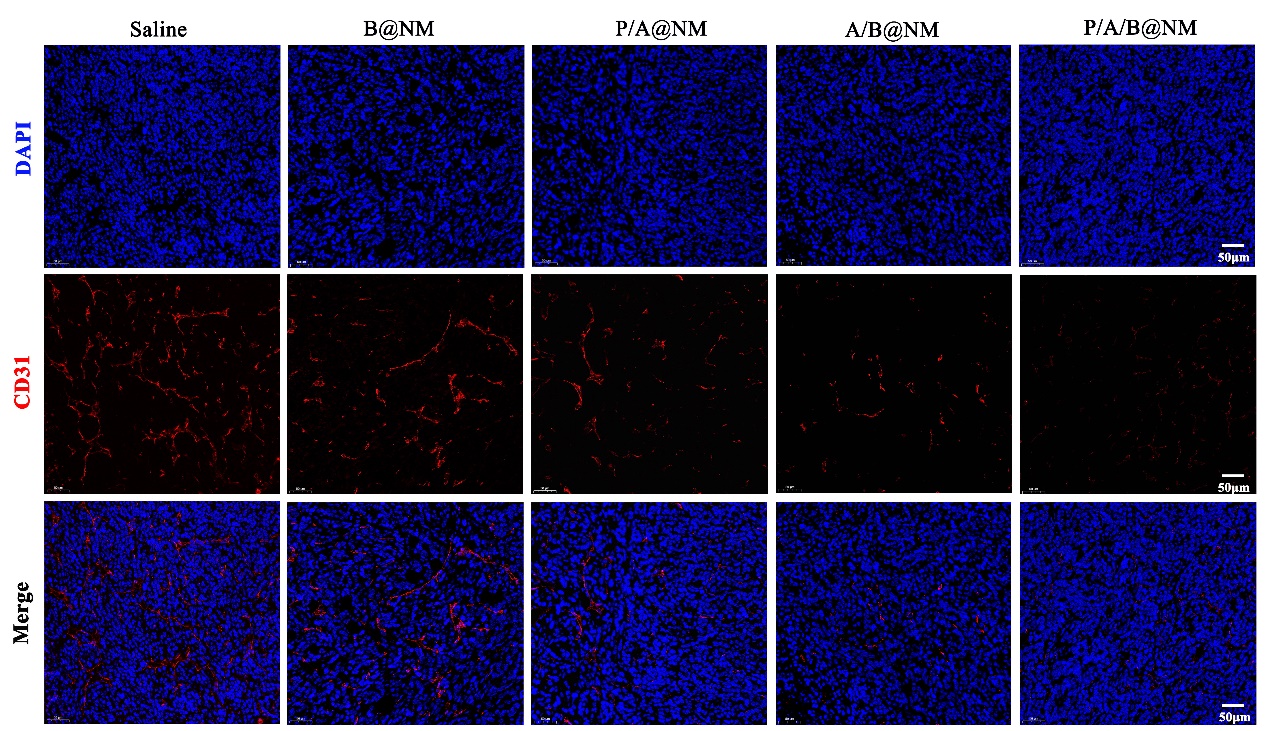


**Figure S2** Co-delivery nanomicelles based combination therapy reduced angiogenesis.


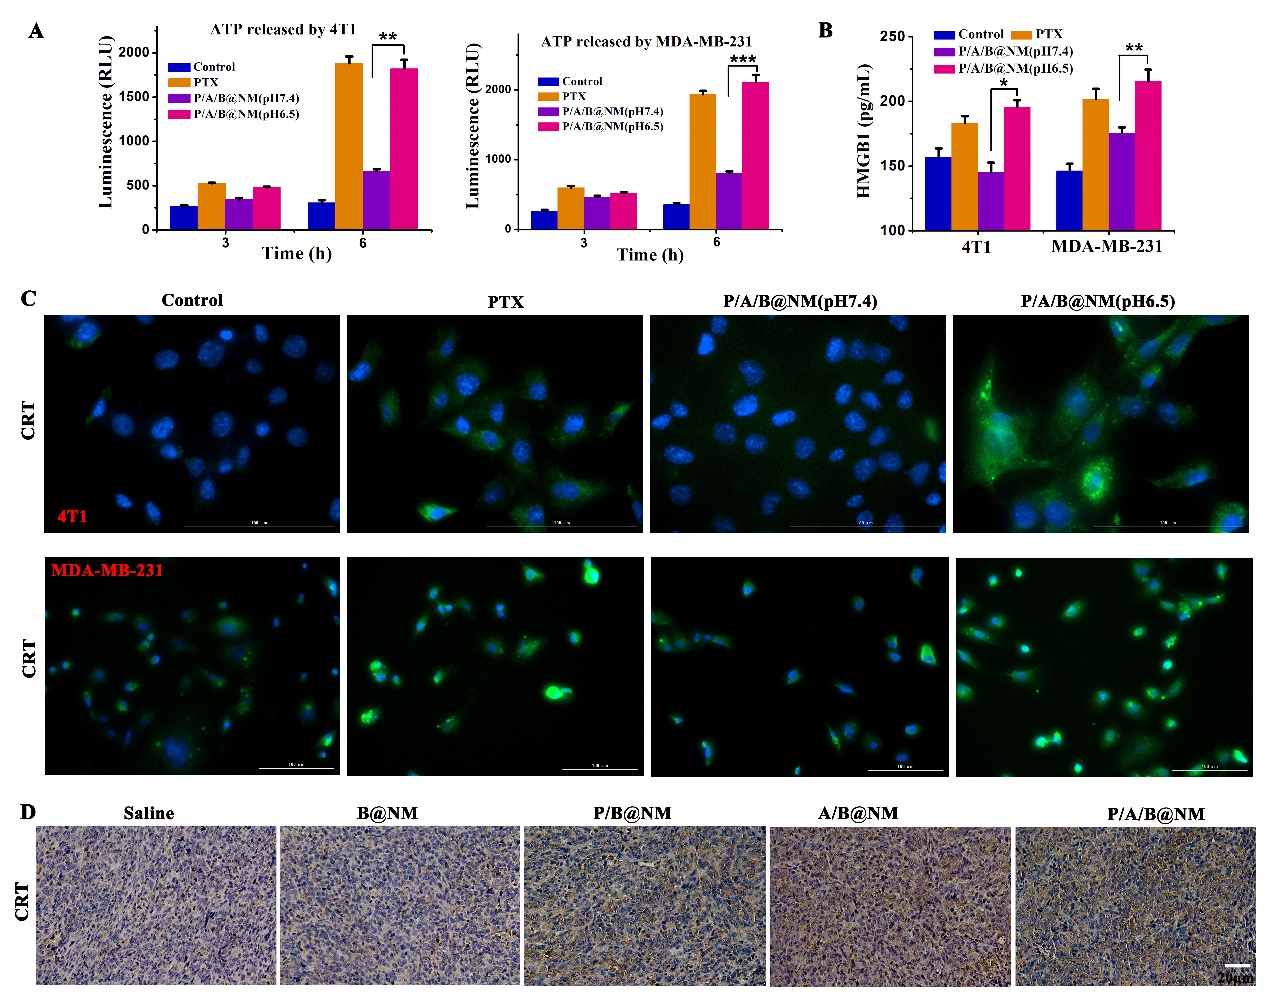


**Figure S3** Co-delivery nanomicelles based combination therapy induced ICD. (A and B) P/A/B@NM promoted the release of ATP and HMGB1 in 4T1 and MDA-MB-231 cells (*n*=3). (C) Representative images of CRT expression in 4T1 and MDA-MB-231 cells using IF assay after P/A/B@NM treatment. (D) Representative images of CRT expression in tumor tissues using IHC assay after co-delivery nanomicelles based combination therapy. Error bars represent means ± SEM. ***P* < 0.01, ****P* < 0.001.


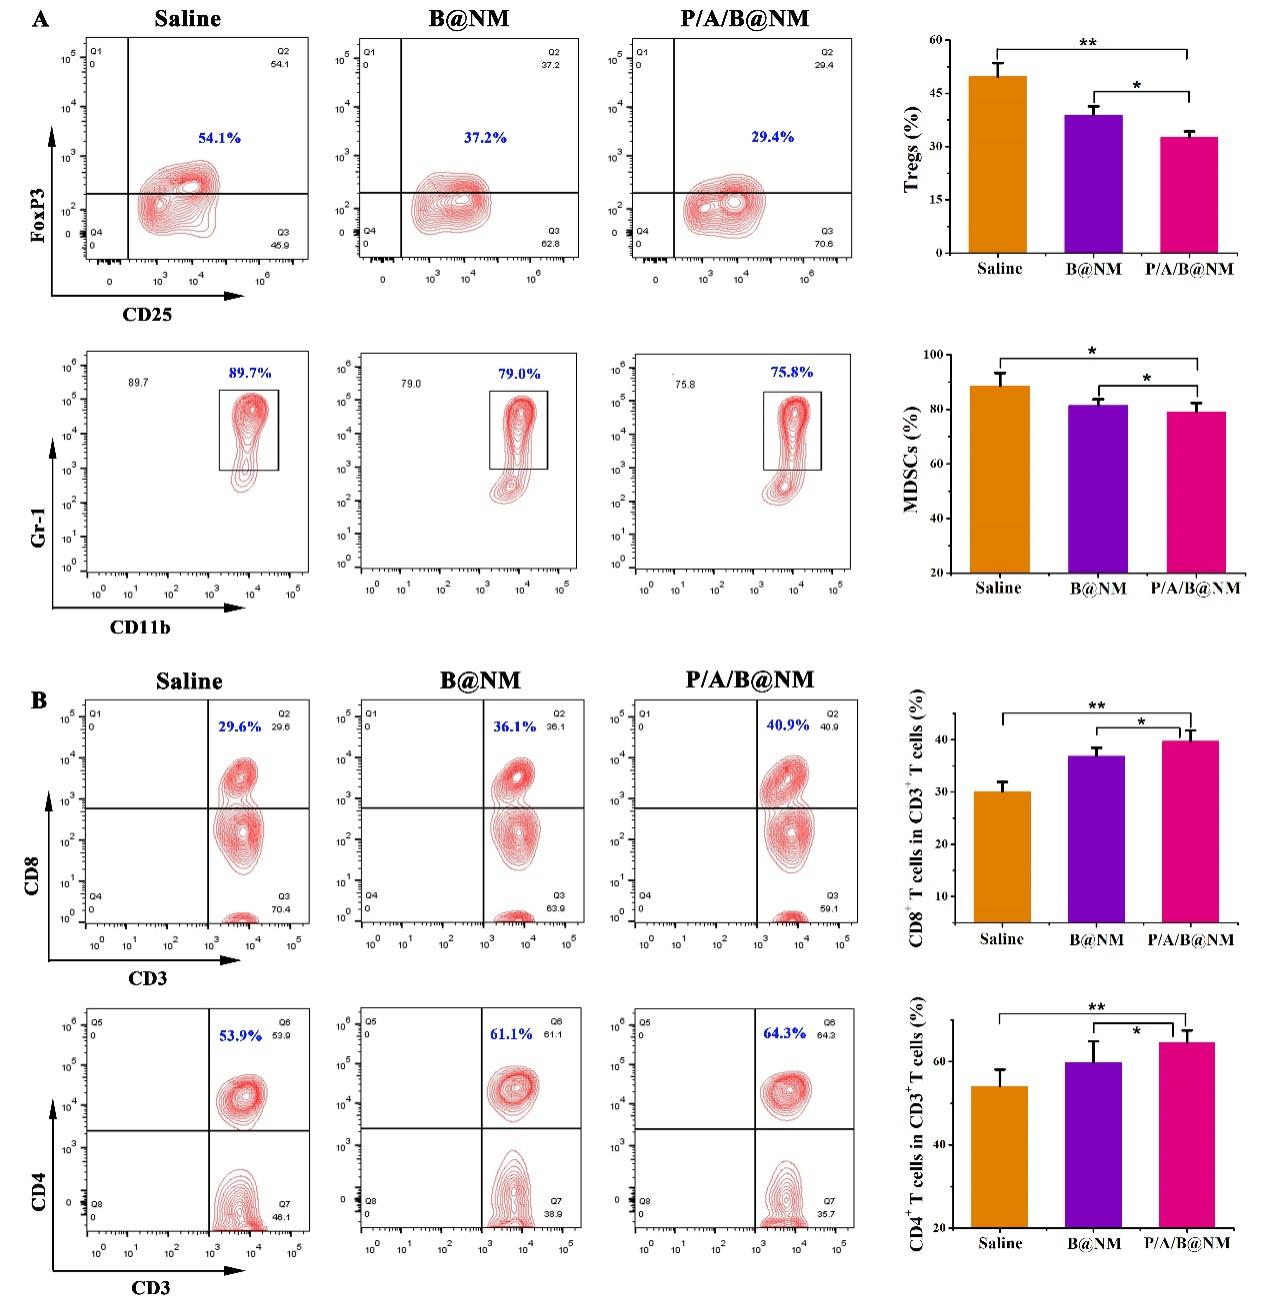


**Figure S4** Co-delivery nanomicelles based combination therapy improved systemic immunity in spleen. (A) Representative cytometric dot plots of CD3+CD8+ T cells and CD3+CD4+ T cells in spleens (left) and the proportions of CD3+CD8+ T cells and CD3+CD4+ T cells in spleens in different treatment groups (right) (*n*=3). (B) Representative cytometric dot plots of Tregs cells and MDSCs in spleens (left) and percentage of Tregs cells and MDSCs of spleens in different treatment groups (right) (*n*=3). Error bars represent means ± SEM. **P* < 0.05, ***P* < 0.01.
